# Supplementary material
Source: publisher figshare collection journal article supplement (https://gsajournals.figshare.com/articles/dataset/_/9905279)
Supplement: Supplementary file 2 [file 1]

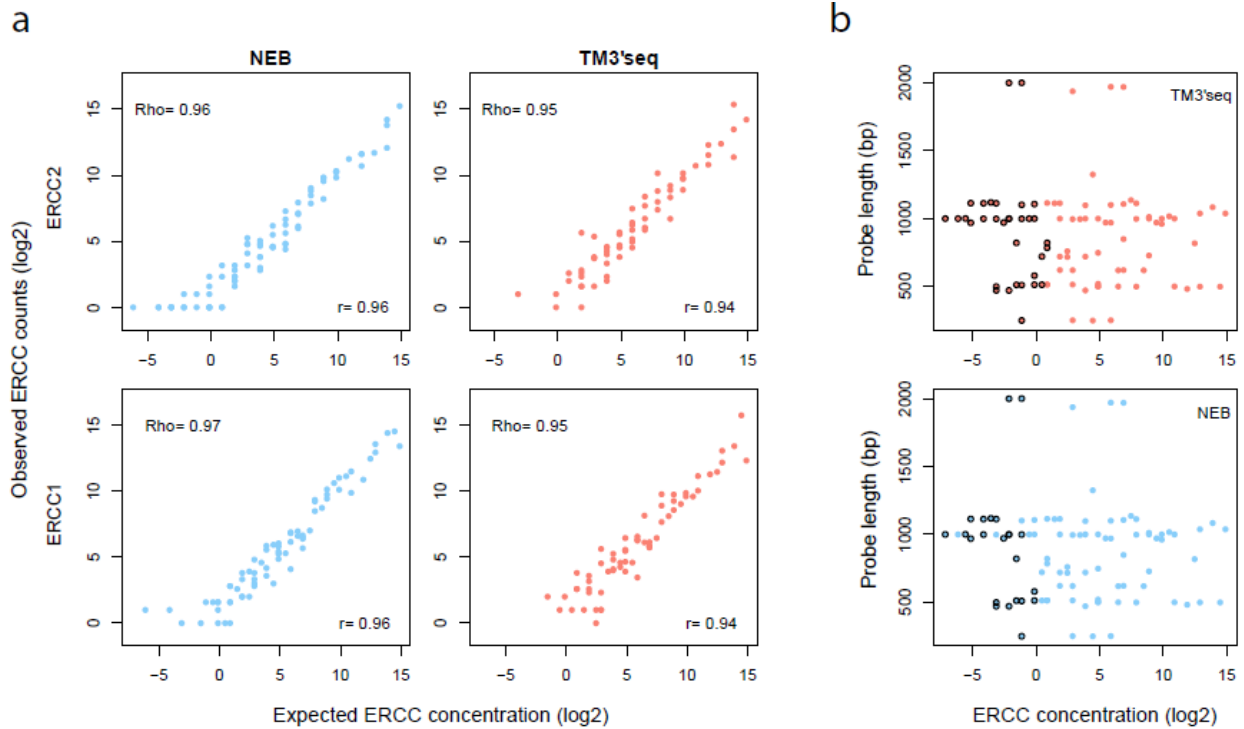

**Figure S3. Technical performance of TM3'seq and NEB methods based on detection of ERCC probes.** (a) Expected vs observed ERCC amounts. Pearson ( $r^2$ ) and Spearman rank ( $\rho$ ) correlations are shown; each value corresponds to the average of two replicates. (b) Detection performance of ERCC probes given the length and the concentration of the probe. Each dot represents an ERCC probe, dots with black border represent the probes that were not detected in any of the four samples per method, or that have a mean expression <1 based on the output of ERCC-Dashboard (MUNRO *et al.* 2014).

Reference:

Munro, S. A., S. P. Lund, P. S. Pine, H. Binder, D. A. Clevert *et al.*, 2014 Assessing technical performance in differential gene expression experiments with external spike-in RNA control ratio mixtures. Nat Commun 5: 5125.
