# Supplementary material
Source: publisher figshare collection journal article supplement (https://gsajournals.figshare.com/articles/dataset/_/9905279)
Supplement: Supplementary file 5 [file 1]

### Supplementary File 3. Incorporation of UMIs into the TM3'seq protocol

Unique molecular identifiers have been extensively used in single-cell transcriptomics to account for the amplification bias resulting from the high number of whole-transcriptome amplification cycles. Given that other kinds of RNAseq experiments start with larger amounts of RNA input, and that it has been shown that removing duplicates only marginally improve FDR and power in differential gene expression analysis (Parekh et al. 2016), UMIs are not widely used outside of single-cell transcriptomics field. However, since it might be desirable to include UMI in certain types of experiments, here we show how to implement UMIs into the TM3'seq protocol.

UMIs can be added either to the oligo-dT or i5 oligos. In the first case UMIs will be incorporated during the RT reaction and will function like in single-cell approaches, i.e. each mRNA molecule will have a unique identifier and sequencing will require pair-end reads. If it is desired to keep costs low, UMIs can be added to the i5 oligo because this allows to sequence both indexes (i5 and i7) and UMI using single-end sequencing. The caveat of the second approach is that mRNA molecules have been amplified for three cycles before the UMIs are incorporated. This will result in an overestimation of the total number of unique molecules but will still account for the vast majority of duplicates generated during the post-tagmentation library amplification cycles (12-18 cycles).

Given that the power gained from accounting for duplicates in RNAseq experiments is just marginal (Parekh et al. 2016), here we show how to implement UMIs into the currently optimized TM3'seq protocol while preserving single-end sequencing.

To incorporate UMIs in the i5 oligo, a sequence of 8 random nucleotides is added to the standard i5idx Illumina barcode, where **N** indicates the i5 barcode, and **n** the UMI:

```
AATGATACGGCGACCACCGAGATCTACACNNNNNNNNnnnnnnnnTCGTCTGCGCAGCGTC
```

The TM3'seq protocol can be followed in the same way as described in Suppl. File 1, with an additional step cleaning step at the final library amplification step:

- **Final library amplification:**

In this final step, 10ul of OneTaq HS Quick-Load 2x (NEB, #M0486L), 1ul i5 primer (i5 barcode + UMI) 1uM, 1ul i7 primer 1uM, and 7ul of water are used to amplify 1ul of the tagmentation reaction following the program: 68°C 3min, 95°C 30sec, [95°C 10sec, 55°C 30sec, 68°C 30sec] \*3 cycles, 68°C 5min. These three cycles allow the incorporation of unique i5 primers (and therefore unique UMI) to each RNA molecule. To avoid the unspecific amplification of RNA

molecules by free i5 primers, the samples are pooled and cleaned using a ratio of 1x Agencourt AMPure XP beads (Beckman Coulter, #A63881). The pool of samples is then amplified for extra 12cycles (or how many are desired) using i5 primes that do not contain UMI barcodes following the program: 68°C 3min, 95°C 30sec, [95°C 10sec, 55°C 30sec, 68°C 30sec] \*15 **cycles**, 68°C 5min.

## References

Parekh, S., C. Ziegenhain, B. Vieth, W. Enard and I. Hellmann (2016). "The impact of amplification on differential expression analyses by RNA-seq." Scientific Reports **6**: 25533.
