# Supplementary material
Source: publisher figshare collection journal article supplement (https://gsajournals.figshare.com/articles/dataset/_/9905279)

mRNA (optional) or total RNA

① Annealing of oligo(dT) primer

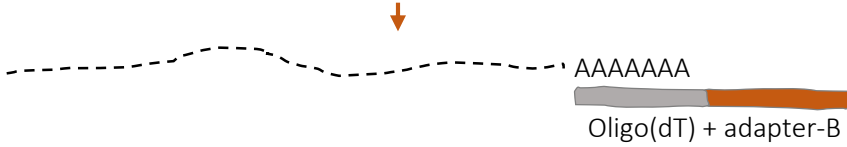

② Reverse transcription

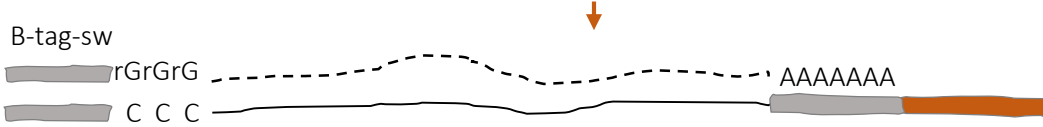

③ cDNA amplification

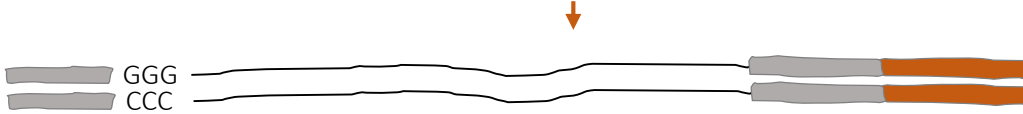

④ Tagmentation and adapter ligation

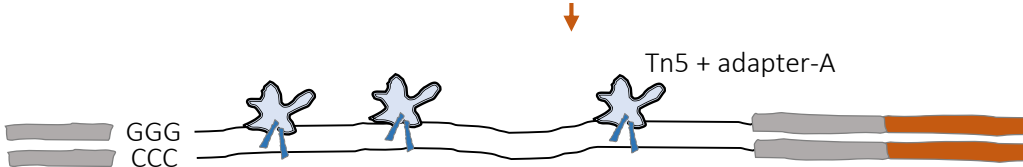

⑤ Amplification of 3' end and sample barcoding

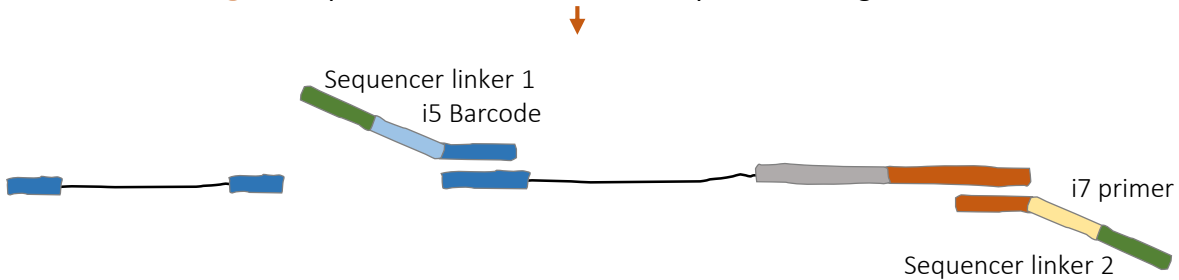

⑥ Pooling of libraries and sequencing

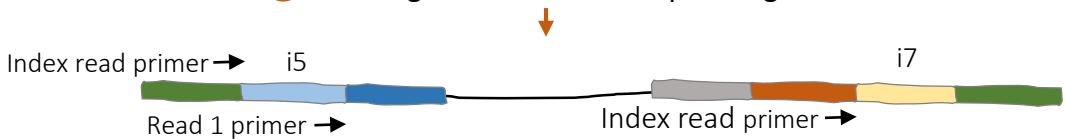

Supplement: Supplementary file 7 [file 1]
