# Supplementary material
Source: publisher figshare collection journal article supplement (https://gsajournals.figshare.com/articles/dataset/_/9905279)
Supplement: Supplementary file 11 [file 1]

**Supplementary Table 1.** Oligonucleotides used in TM3'seq protocol. All oligos were synthesized using standard desalting by Integrated DNA Technologies – IDT.

| Oligo name              | Oligo sequence                                                            |
|-------------------------|---------------------------------------------------------------------------|
| Tn5ME-B-30T             | 5'-GTCTCGTGGGCTCGGAGATGTGTATAAGAGACAGTTTTTTTTTTTTTTTTTTTTTTTTTTTTTTTTV-3' |
| B-tag-sw                | /5Biosg/ACCCCATGGGGCTACACGACGCTCTTCCGATCTrGrGrG                           |
| Adapter-A (Illumina)    | 5'- TCGTCGGCAGCGTCAGATGTGTATAAGAGACAG-3'                                  |
| Tn5MErev (Picelli 2014) | 5'-[phos]CTGTCTCTTATACACATCT-3'                                           |
| i5 (Illumina Idx5)      | AATGATACGGCGACCACCGAGATCTACACNNNNNNNN*TCGTCGGCAGCGTC                      |
| i7 (Illumina Idx7)      | CAAGCAGAAGACGGCATACGAGATNNNNNNNN*GTCTCGTGGGCTCGG                          |

\*N, indicates i7 or i5 barcodes. Standard Illumina barcodes were used.
