# Supplementary material
Source: publisher figshare collection journal article supplement (https://gsajournals.figshare.com/articles/dataset/_/9905279)
Supplement: Supplementary file 13 [file 1]

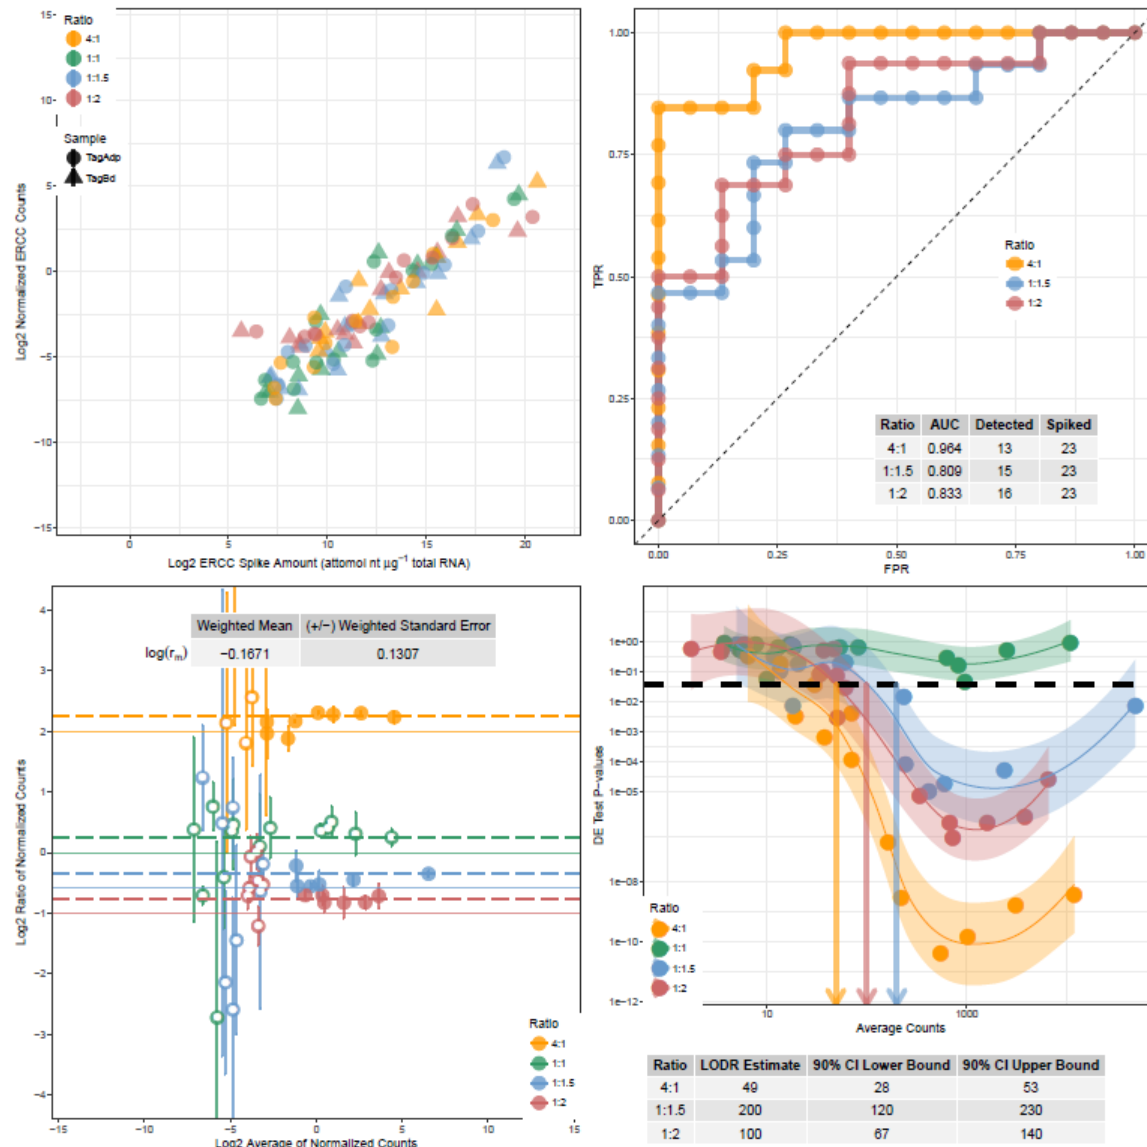

**Figure S4. Raw output of ERCC-Dashboard for TM3'seq libraries.** ERCC-Dashboard (Munro et al. 2014) was used to evaluate the technical performance of ERCC detection. The four panels correspond to a) expected vs observed ERCC counts, b) detection performance (AUC), c) bias ratio detection, and d) limit of detection.
