# Supplementary material
Source: publisher figshare collection journal article supplement (https://gsajournals.figshare.com/articles/dataset/_/9905279)

**a**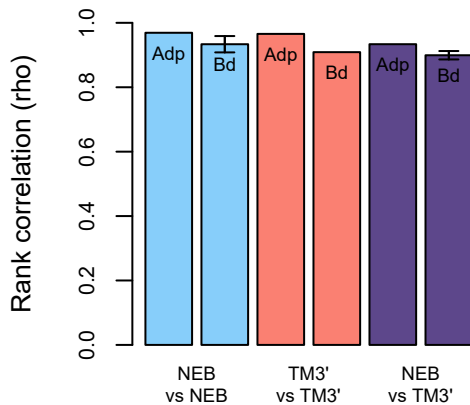**b**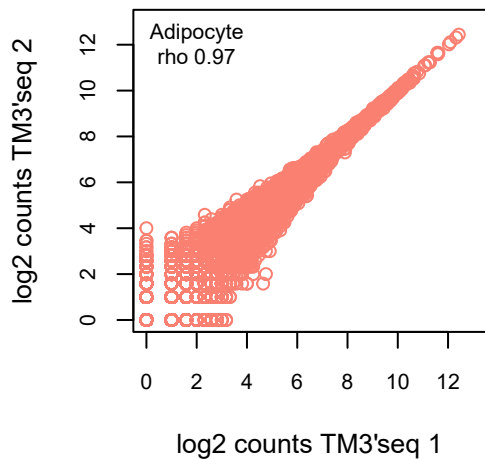**c**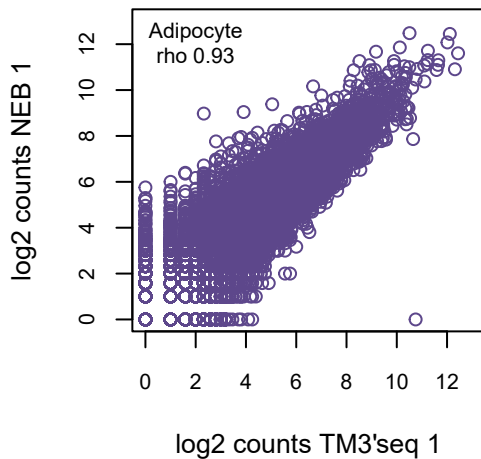**d**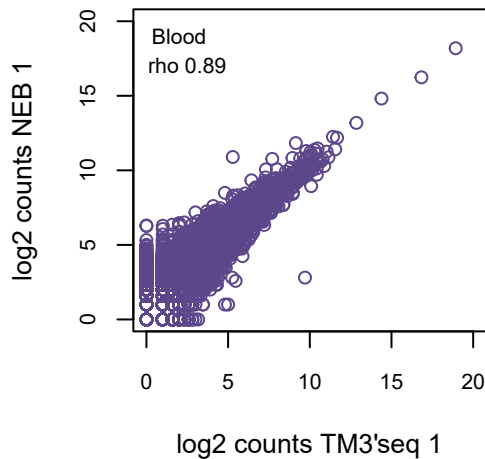

Supplement: Supplementary file 1 [file 1]

**a**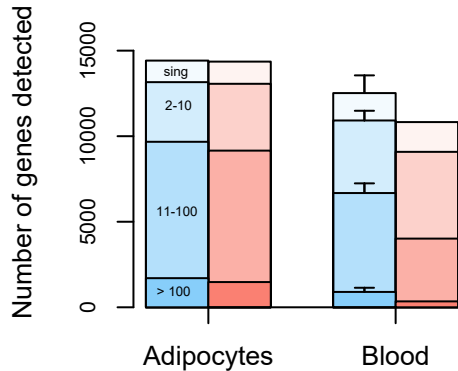**b**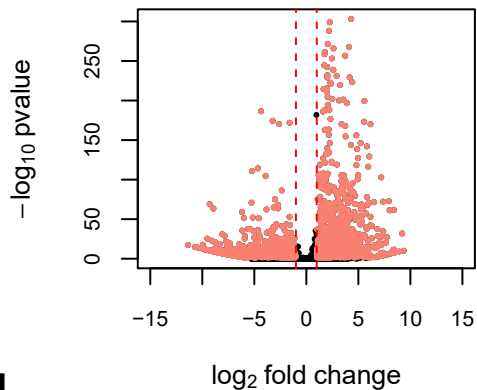**c**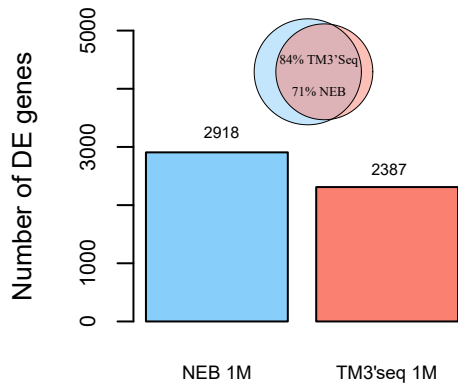**d**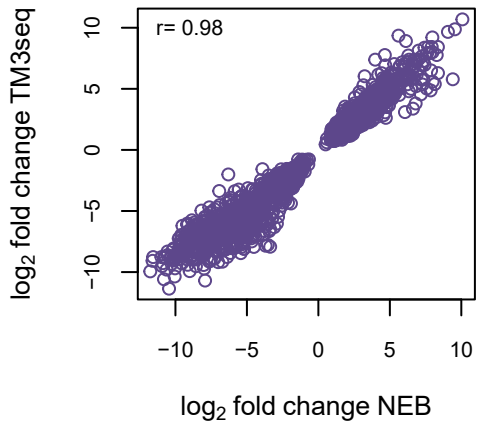

Supplement: Supplementary file 3 [file 1]

**a**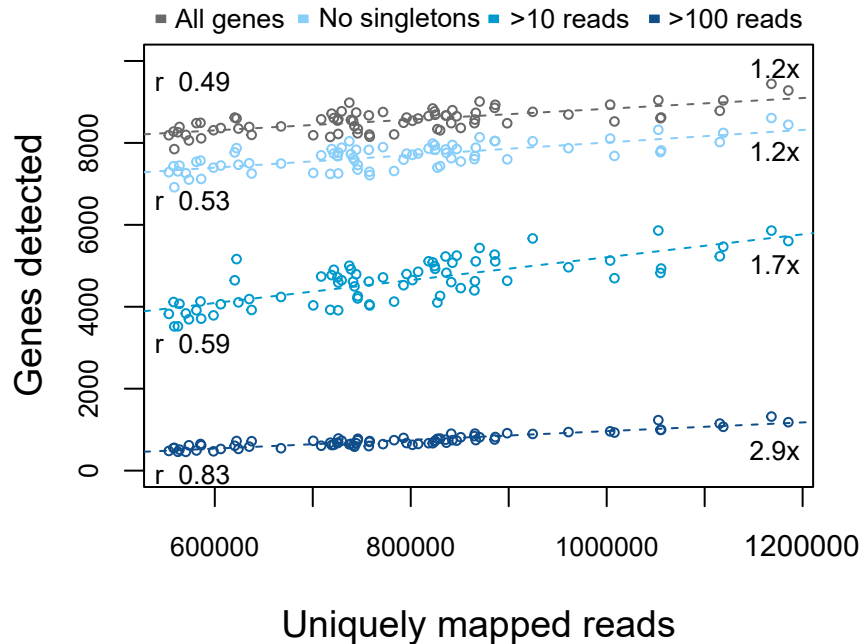**b**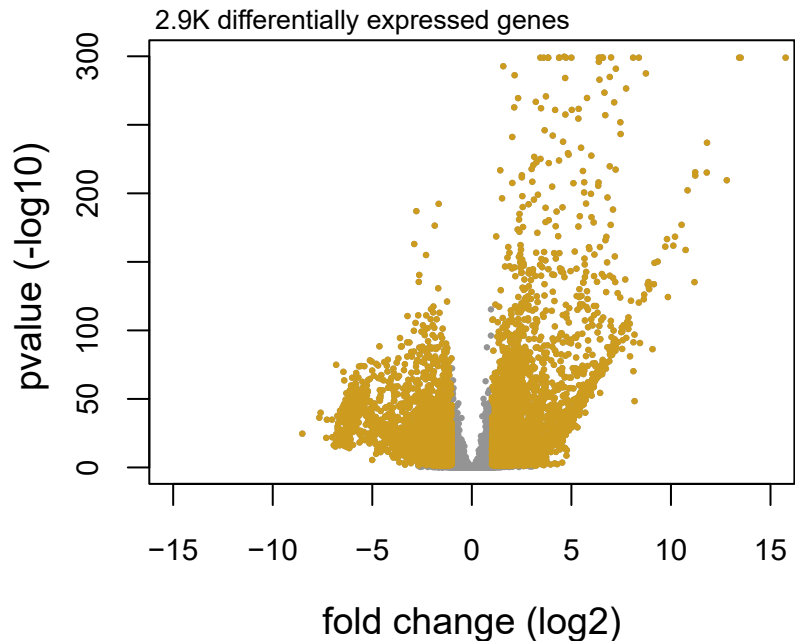

Supplement: Supplementary file 6 [file 1]
